# Supplementary material for: The thermal stabilization behavior and mechanism of a metal organic framework with high thermal stability towards PVC
Source: Royal Society of Chemistry journal article supplement (doi:10.1039/d2nj02233h), 2022-01-01
Supplement: d2nj02233h1.pdf [file d2nj02233h1.pdf]

## **The thermal stabilization behavior and mechanism of metal organic framework with high thermal stability towards PVC**

Mei Wang,<sup>a,\*</sup> Guanglin Wang,<sup>a</sup> Xianghai Song,<sup>b</sup> Puyou Jia,<sup>c,\*</sup> Bingliang Zhou,<sup>a</sup> Quan  
Bu,<sup>a</sup> Shouqi Yuan<sup>d</sup>

<sup>a</sup>School of Agricultural Engineering, Jiangsu University, Zhenjiang 212013, P. R. China

<sup>b</sup>Institute of the Green Chemistry and Chemical Technology, School of Chemistry and Chemical  
Engineering, Jiangsu University, Zhenjiang 212013, P. R. China

<sup>c</sup>Institute of Chemical Industry of Forest Products, Chinese Academy of Forestry (CAF), Key Lab  
of Biomass Energy and Materials, Jiangsu Province, 16 Suojin North Road, Nanjing, 210042, PR  
China

<sup>d</sup>Research Center of Fluid Machinery Engineering and Technology, Jiangsu University, Zhenjiang  
212013, PR China

Corresponding Email: 1000004927@ujs.edu.cn (M. Wang), jiapuyou@icifp.cn (P. Jia)

### *Molecular Structure Characterization*

The Fourier transform infrared (FT-IR) spectra were obtained on a Nicolet iS10 FT-IR (Nicolet Instrument Corp., USA) infrared spectrophotometer. The experiment was performed within 400-4000  $\text{cm}^{-1}$  with KBr as a reference.

Scanning electron microscopy (SEM) images were tested by using a FEI-NOVA Nano SEM 450 scanning electron microscope operated at 5 and 10 kV. The particle size distribution of Zn-Atz crystals was determined by manual measurement of the crystals in SEM image with Photoshop software. About 100 particles in the FE-SEM image were measured to determine the average particle size.

X-ray diffraction (XRD) characterization was performed on Ultima IV X-ray diffractometer equipped with Cu K $\alpha$  radiation (40 KV, 200 mA). The scanning was performed within ( $2\theta$ ) 20-75° with a step function of 0.02 and a scanning rate of 20°  $\text{min}^{-1}$ .

The morphology of fracture surface and plane of PVC sample were studied with a Hitachi Regulus8100 instrument operated at 3 kV after the gold sputtering treat.

| PVC samples | Fracture surface (100 um)                                                         | Fracture surface (20 um)                                                          | Plane (100 um)                                                                     | Plane (20 um)                                                                       |
|-------------|-----------------------------------------------------------------------------------|-----------------------------------------------------------------------------------|------------------------------------------------------------------------------------|-------------------------------------------------------------------------------------|
| Z1          | 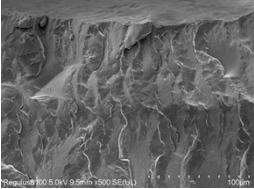 |  |  |  |
| Z13         |  |  |  |  |

Fig.S1 The morphology of fracture surface and plane of PVC sample.
